# Supplementary material for: Mass Spectrometry-Based Metabolomic and Proteomic Strategies in Organic Acidemias
Source: PubMed Central journal article supplement (PMC4923558; doi:10.1155/2016/9210408), 2016-06-14
Supplement: 9210408.f1.pdf [file 9210408.f1.pdf]

# Supporting information for

## Mass spectrometry-based metabolomic and proteomic strategies in organic acidemias.

Imperlini Esther<sup>1</sup>, Santorelli Lucia<sup>2</sup>, Orrù Stefania<sup>2,3</sup>, Scolamiero Emanuela<sup>2</sup>, Ruoppolo Margherita<sup>2,4</sup>, Caterino Marianna<sup>4\*</sup>

1) Fondazione IRCCS SDN, Naples, Italy

2) CEINGE Biotecnologie Avanzate scarl, Naples, Italy

3) Dipartimento di Scienze Motorie e del Benessere, Università di Napoli "Parthenope", Naples, Italy

4) Dipartimento di Medicina Molecolare e Biotecnologie Mediche, Università degli Studi di Napoli "Federico II", Naples, Italy

**Supplementary Table 1. Genetic abnormalities of OAs.**

| <b>OAs</b>               | <b>Gene</b>            | <b>Mutations*</b>         | <b>References</b>                                                                                                                                                                |
|--------------------------|------------------------|---------------------------|----------------------------------------------------------------------------------------------------------------------------------------------------------------------------------|
| MSUD                     | DBT                    | DBT, 124-BP DEL           | Herring et al. (1991)                                                                                                                                                            |
|                          |                        | DBT, PHE215CYS            | Fisher et al. (1991)                                                                                                                                                             |
|                          |                        | DBT, 17-BP INS            | Chuang et al. (1991)                                                                                                                                                             |
|                          |                        | DBT, 78-BP DEL            | Mitsubuchi et al. (1991)                                                                                                                                                         |
|                          |                        | DBT, 126-BP INS           | Tsuruta et al. (1998)                                                                                                                                                            |
|                          |                        | DBT, TER422LEU            | Tsuruta et al. (1998)                                                                                                                                                            |
|                          |                        | DBT, ILE37MET             | Tsuruta et al. (1998)                                                                                                                                                            |
|                          |                        | DBT, GLY323SER            | Tsuruta et al. (1998)                                                                                                                                                            |
|                          |                        | DBT, 2-BP DEL, 88AT       | Fisher et al. (1993)                                                                                                                                                             |
|                          |                        | DBT, 4.7-KB DEL           | Chi et al. (2003)                                                                                                                                                                |
|                          |                        | DBT, HIS391ARG            | Chuang et al. (2004)                                                                                                                                                             |
|                          |                        | DBT, SER133TER            | Chuang et al. (2004)                                                                                                                                                             |
|                          |                        | BCKDHB                    | BCKDHB                                                                                                                                                                           |
| BCKDHB, ARG183PRO        | Edelmann et al. (2001) |                           |                                                                                                                                                                                  |
| BCKDHB, HIS156TYR        | Chuang et al. (2004)   |                           |                                                                                                                                                                                  |
| BCKDHB, VAL69GLY         | Chuang et al. (2004)   |                           |                                                                                                                                                                                  |
| BCKDHB, 4-BP DEL, IVS9   | Chuang et al. (2004)   |                           |                                                                                                                                                                                  |
| BCKDHB, 8-BP INS, NT1109 | Chuang et al. (2004)   |                           |                                                                                                                                                                                  |
| BCKDHA                   | BCKDHA                 | BCKDHA, TYR393ASN         | Zhang et al. (1991); Chuang et al. (1994); Matsuda et al. (1990); Dariush et al. (1991); Fisher et al. (1991); Mitsubuchi et al. (1992); Wynn et al. (1998); Puffenberger (2003) |
|                          |                        | BCKDHA, 8-BP DEL, 887-894 | Zhang et al. (1989); Chuang et al. (1994)                                                                                                                                        |
|                          |                        | BCKDHA, GLY245ARG         | Chuang et al. (1995); Wynn et al. (1998);                                                                                                                                        |
|                          |                        | BCKDHA, PHE364CYS         | Chuang et al. (1995); Wynn et al. (1998);                                                                                                                                        |
|                          |                        | BCKDHA, ARG220TRP         | Wynn et al. (1998)                                                                                                                                                               |
|                          |                        | BCKDHA, GLY204SER         | Wynn et al. (1998)                                                                                                                                                               |
|                          |                        | BCKDHA, THR265ARG         | Wynn et al. (1998)                                                                                                                                                               |
|                          |                        | BCKDHA, CYS219TRP         | Chuang et al. (2004)                                                                                                                                                             |

|     |      |                                    |                                                                  |
|-----|------|------------------------------------|------------------------------------------------------------------|
|     |      | BCKDHA, 1-BP DEL, 117C             | Quental et al. (2008); Quental et al. (2009)                     |
| PA  | PCCB | PCCB, ARG412TRP                    | Tahara et al. (1990); Ugarte et al. (1999)                       |
|     |      | PCCB, 8-BP DEL, NT3                | Ohura et al. (1993)                                              |
|     |      | PCCB, 12-BP INS, 14-BP DEL, NT1218 | Rodriguez-Pombo et al. (1998)                                    |
|     |      | PCCB, 1-BP INS, 1170T              | Rodriguez-Pombo et al. (1998)                                    |
|     |      | PCCB, GLU168LYS                    | Rodriguez-Pombo et al. (1998)                                    |
|     |      | PCCB, THR428ILE                    | Ohura et al. (1993)                                              |
|     |      | PCCB, 3-BP INS, 1540CCC            | Ravn et al. (2000)                                               |
|     |      | PCCB, TYR435CYS                    | Yorifuji et al. (2002)                                           |
|     |      | PCCB, IVS6, A-G, +462              | Rincon et al. (2007)                                             |
|     | PCCA | PCCA, 4-BP DEL, 1824IVS, +3        | Clavero et al. (2004); Richard et al. (1997)                     |
|     |      | PCCA, 9-BP DEL, 1771IVS, -2        | Richard et al. (1997)                                            |
|     |      | PCCA, 2-BP INS, 1824IVS, +3        | Richard et al. (1997)                                            |
|     |      | PCCA, ARG288TER                    | Campeau et al. (1999)                                            |
|     |      | PCCA, MET348LYS                    | Richard et al. (1999)                                            |
|     |      | PCCA, IVS14, A-G, -1416            | Rincon et al. (2007)                                             |
| MMA | MUT  | MUT, GLN17TER                      | Fenton et al. (1987); Ledley et al. (1990)                       |
|     |      | MUT, TRP105ARG                     | Jansen and Ledley (1990)                                         |
|     |      | MUT, ALA378GLU                     | Jansen and Ledley (1990)                                         |
|     |      | MUT, ARG93HIS                      | Raff et al. (1991); Ledley and Rosenblatt (1997)                 |
|     |      | MUT, GLY717VAL                     | Ledley et al. (1990) ; Crane et al. (1992); Worgan et al. (2006) |
|     |      | MUT, GLU117TER                     | Ogasawara et al. (1994)                                          |
|     |      | MUT, 2-BP DEL, 769CA               | Ogasawara et al. (1994)                                          |
|     |      | MUT, GLY623ARG                     | Qureshi et al. (1994)                                            |
|     |      | MUT, GLY703ARG                     | Qureshi et al. (1994)                                            |
|     |      | MUT, ASN219TYR                     | Acquaviva et al. (2001); Berger et al. (2001)                    |
|     |      | MUT, ARG108CYS                     | Worgan et al. (2006)                                             |
|     |      | MUT, GLY215SER                     | Cavicchi et al. (2006)                                           |
|     |      | MUT, IVS11, C-A, -891              | Rincon et al. (2007); Martinez et al. (2005)                     |

|                       |                          |                                                                                                               |
|-----------------------|--------------------------|---------------------------------------------------------------------------------------------------------------|
|                       | MUT, 1808G-A             | Rincon et al. (2007)                                                                                          |
| MMACHC                | MMACHC, 1-BP DUP, 271A   | Lerner-Ellis et al. (2006)                                                                                    |
|                       | MMACHC, LEU116PRO        | Lerner-Ellis et al. (2006)                                                                                    |
|                       | MMACHC, ARG132TER        | Lerner-Ellis et al. (2006); Morel et al. (2006); Ben-Omran et al. (2007); Lerner-Ellis et al. (2009)          |
|                       | MMACHC, ARG111TER        | Morel et al. (2006); Lerner-Ellis et al. (2009)                                                               |
|                       | MMACHC, ARG161GLN        | Bodamer et al. (2001); Morel et al. (2006); Tsai et al. (2007); Lerner-Ellis et al. (2009); Liu et al. (2010) |
|                       | MMACHC, TRP203TER        | Liu et al. (2010)                                                                                             |
|                       | MMACHC, 3-BP DEL, 658AAG | Liu et al. (2010)                                                                                             |
|                       | MMACHC, GLU92ASP         | Komhoff et al. (2013)                                                                                         |
|                       | MMACHC, GLU92GLU         | Komhoff et al. (2013)                                                                                         |
|                       | MMACHC, GLY155GLU        | Komhoff et al. (2013)                                                                                         |
| MMAA                  | MMAA, 4-BP DEL, 592ACTG  | Dobson et al. (2002)                                                                                          |
|                       | MMAA, 8-BP INS, NT260    | Dobson et al. (2002)                                                                                          |
|                       | MMAA, GLN95TER           | Dobson et al. (2002)                                                                                          |
|                       | MMAA, TYR207CYS          | Dobson et al. (2002)                                                                                          |
|                       | MMAA, ARG145TER          | Lerner-Ellis et al. (2004)                                                                                    |
| MMAB                  | MMAB, ARG186TRP          | Dobson et al. (2002)                                                                                          |
|                       | MMAB, IVS3, G-A, -1      | Dobson et al. (2002)                                                                                          |
|                       | MMAB, 5-BP DEL, NT572    | Dobson et al. (2002)                                                                                          |
|                       | MMAB, ILE96THR           | Jorge-Finnigan et al. (2010)                                                                                  |
|                       | MMAB, SER174FS           | Brasil et al. (2015)                                                                                          |
|                       | MMAB, ARG191TRP          | Jorge-Finnigan et al. (2010)                                                                                  |
|                       | MMAB, IVS4AS, G-C, -1    | Jorge-Finnigan et al. (2010)                                                                                  |
|                       | MMAB, 290G-A             | Jorge-Finnigan et al. (2010)                                                                                  |
|                       | MMAB, HIS183LEU          | Brasil et al. (2015)                                                                                          |
| MMAB, 3-BP DUP, NT568 | Brasil et al. (2015)     |                                                                                                               |
| MMADHC                | MMADHC, LEU259PRO        | Coelho et al. (2008); Suormala et al. (2004)                                                                  |
|                       | MMADHC, THR182ASN        | Coelho et al. (2008)                                                                                          |

|      |        |                          |                                                 |
|------|--------|--------------------------|-------------------------------------------------|
|      |        | MMADHC, TYR249CYS        | Coelho et al. (2008)                            |
|      |        | MMADHC, 8-BP DEL, NT57   | Coelho et al. (2008); Suormala et al. (2004)    |
|      |        | MMADHC, ARG54TER         | Coelho et al. (2008)                            |
|      |        | MMADHC, 18-BP DUP, NT307 | Coelho et al. (2008)                            |
|      |        | MMADHC, ARG250TER        | Goodman et al. (1970); Coelho et al. (2008)     |
|      |        | MMADHC, 1-BP DUP, 419A   | Coelho et al. (2008)                            |
|      |        | MMADHC, IVS7DS, 4-BP DEL | Coelho et al. (2008)                            |
|      | LMBRD1 | LMBRD1, 1-BP DEL, 1056G  | Rutsch et al. (2009)                            |
|      |        | LMBRD1, 2-BP DEL, 515AC  | Rutsch et al. (2009)                            |
|      |        | LMRBD1, 1-BP DEL, 404C   | Rutsch et al. (2009)                            |
|      | HCFC1  | HCFC1, 455A-G            | Gedeon et al. (1991); Huang et al. (2012)       |
|      |        | HCFC1, SER225ASN         | Huang et al. (2012)                             |
|      |        | HCFC1, ALA115VAL         | Yu et al. (2013)                                |
|      |        | HCFC1, ALA73VAL          | Yu et al. (2013)                                |
|      |        | HCFC1, ALA73THR          | Yu et al. (2013)                                |
| IVA  | IVD    | IVD, LEU13PRO            | Vockley et al. (1991)                           |
|      |        | IVD, GLY170VAL           | Vockley et al. (1991)                           |
|      |        | IVD, 1-BP DEL, 1177T     | Vockley et al. (1991)                           |
|      |        | IVD, 90-BP DEL, NT145    | Vockley et al. (1992)                           |
|      |        | IVD, IVS7AS, G-A, -1     | Vockley et al. (2000)                           |
|      |        | IVD, ARG21CYS            | Vockley et al. (2000)                           |
|      |        | IVD, ALA282VAL           | Ensenauer et al. (2004)                         |
| GA I | GCDH   | GCDH, TYR295HIS          | Biery and Goodman (1992); Goodman et al. (1995) |
|      |        | GCDH, ALA421VAL          | Biery et al. (1996)                             |
|      |        | GCDH, THR416ILE          | Anikster et al. (1996)                          |
|      |        | GCDH, ARG402TRP          | Zschocke et al. (2000)                          |
|      |        | GCDH, GLU365LYS          | Kolker et al. (2001); Zschocke et al. (2000)    |
|      |        | GCDH, IVS1, G-T, +5      | Greenberg et al. (1995)                         |
|      |        | GCDH, ALA293THR          | Biery et al. (1996)                             |

|                 |       |                                |                                                     |
|-----------------|-------|--------------------------------|-----------------------------------------------------|
|                 |       | GCDH, VAL400MET                | Biery et al. (1996); Marti-Masso et al. (2012)      |
|                 |       | GCDH, ARG227PRO                | Biery et al. (1996)                                 |
| $\beta$ -KTD    | ACAT1 | ACAT1, ALA347THR               | Fukao et al. (1991)                                 |
|                 |       | ACAT1, GLY150ARG               | Fukao et al. (1991); Schutgens et al. (1982)        |
|                 |       | ACAT1, IVS8, G-T, +1           | Fukao et al. (1991)                                 |
|                 |       | ACAT1, IVS10, A-C, -2          | Fukao et al. (1991)                                 |
|                 |       | ACAT1, IVS10, G-C, -1          | Fukao et al. (1991)                                 |
|                 |       | ACAT1, IVS11, T-C, +2          | Daum et al. (1973), Fukao et al. (1993)             |
|                 |       | ACAT1, MET1LYS                 | Daum et al. (1973), Fukao et al. (1993)             |
|                 |       | ACAT1, GLY379VAL               | Fukao et al. (1994); Steingrimsdottir et al. (1992) |
|                 |       | ACAT1, GLN272TER               | Fukao et al. (1994)                                 |
|                 |       | ACAT1, 3-BP DEL, 1033GAA       | Sewell et al. (1998)                                |
|                 |       | ACAT1, 1-BP INS, 1083A         | Sewell et al. (1998)                                |
|                 |       | ACAT1, ASN93SER                | Fukao et al. (1998)                                 |
|                 |       | ACAT1, ILE312THR               | Fukao et al. (1998)                                 |
|                 |       | ACAT1, ALA333PRO               | Fukao et al. (1998)                                 |
|                 |       | ACAT1, GLN145GLU               | Fukao et al. (2002)                                 |
|                 |       | ACAT1, 1-BP DEL, 149C          | Fukao et al. (1998)                                 |
| HMG-CoA Lyase D | HMGCL | HMGCL, 2-BP DEL, NT202         | Mitchell et al. (1992), Mitchell et al. (1993)      |
|                 |       | HMGCL, VAL70LEU                | Mitchell et al. (1992)                              |
|                 |       | HMGCL, 930-BP DEL, EX3-6DEL    | Wang et al. (1996)                                  |
|                 |       | HMGCL, ARG41GLN                | Mitchell et al. (1998)                              |
|                 |       | HMGCL, GLU279LYS               | Muroi et al. (2000)                                 |
|                 |       | HMGCL, 2-BP DEL, TT, CODON 305 | Mitchell et al. (1998)                              |

\* Mutations, cataloged in OMIM, are selected by criteria for inclusion as described by Amberger et al. Nucleic Acids Research 43:D789, 2015.
